# Supplementary material
Source: HighWire-hosted journal article supplement (https://jitc.bmj.com/content/12/1/e007939)
Supplement: inline-supplementary-material-1 [file inline-supplementary-material-1.pdf]

**SUPPLEMENTARY MATERIAL****TABLE OF CONTENT**

|                              |         |
|------------------------------|---------|
| <b>Supplementary Methods</b> | page 2  |
| <b>Supplementary Tables</b>  | page 6  |
| <b>Supplementary Figures</b> | page 13 |

## **SUPPLEMENTARY METHODS**

### **Next-generation sequencing (NGS) in the Caris dataset.**

NGS was performed on genomic DNA isolated from FFPE samples using an NGS platform (Illumina, Inc., San Diego, CA). A custom-designed SureSelectXT assay (Agilent Technologies, Santa Clara, CA) was used to enrich 592 cancer-related whole-gene targets (Caris MI TumorSeek panel). All variants were detected with > 99% confidence based on allele frequency and amplicon coverage, with an average sequencing coverage depth of 750 and an analytic sensitivity of 5%. Identified genetic variants were analyzed by board-certified molecular geneticists and categorized as follows according to the American College of Medical Genetics and Genomics standards: “pathogenic,” “presumed pathogenic,” “variant of unknown significance,” “presumed benign,” or “benign.” When assessing mutation frequencies of individual genes, “pathogenic” and “presumed pathogenic” were counted as mutations, whereas “variant of unknown significance,” “presumed benign,” and “benign” were excluded.

### **Whole Transcriptome Sequencing (WTS) in the Caris dataset.**

WTS uses a hybrid-capture method to pull down the full transcriptome from a FFPE tumor samples using the Agilent SureSelect Human All Exon V7 bait panel (Agilent Technologies, Santa Clara, CA) and the Illumina NovaSeq platform (Illumina, Inc., San Diego, CA). FFPE specimens underwent pathology review to diagnose percent tumor content and tumor size; a minimum of 10% of tumor content in the area for microdissection was required to enable enrichment and extraction of tumor-specific RNA. Qiagen RNA FFPE tissue extraction kit was used for extraction, and the RNA quality and quantity were determined using the Agilent TapeStation. Biotinylated RNA baits were hybridized to the synthesized and purified cDNA targets and the bait-target complexes were amplified in a post capture PCR reaction. The resultant libraries were quantified and normalized, and the pooled libraries were denatured, diluted and sequenced. Raw data was demultiplexed using the Illumina DRAGEN FFPE accelerator. FASTQ files were aligned with STAR aligner (Alex Dobin, release 2.7.4a github). A full 22,948-gene dataset of expression data was produced by the Salmon, which provides fast and bias-aware quantification of transcript expression(1). BAM files from STAR aligner were

further processed for RNA variants using a custom detection pipeline. The reference genome used was GRCh37/hg19 and analytical validation of this test demonstrated  $\geq 97\%$  Positive Percent Agreement (PPA),  $\geq 99\%$  Negative Percent Agreement (NPA) and  $\geq 99\%$  Overall Percent Agreement (OPA) with a validated comparator method.

### **Immunohistochemical analysis in the Caris dataset.**

Immunohistochemistry (IHC) was performed on full FFPE sections of glass slides. Slides were stained using automated staining techniques, per the manufacturer's instructions, and were optimized and validated per CLIA/CAO and ISO requirements. Staining was scored for intensity (0 = no staining; 1+ = weak staining; 2+ = moderate staining; 3+ = strong staining) and staining percentage (0–100%). A board-certified pathologist evaluated all IHC results independently.

PD-L1 expression was tested by IHC using SP142 antibody (Spring Biosciences), tumors with staining scores of 2+ or 3+ in  $> 5\%$  of tumor cells were regarded as PD-L1 positive.

### **Assessment microsatellite instability (MSI) and mismatch repair (MMR) status in the Caris dataset.**

A combination of multiple test platforms was used to determine the MSI or MMR status of the tumors profiled, including fragment analysis (FA, Promega, Madison, WI), IHC (MLH1, M1 antibody; MSH2, G2191129 antibody; MSH6, 44 anti-body; and PMS2, EPR3947 antibody [Ventana Medical Systems, Inc., Tucson, AZ, USA]) and NGS (for tumors tested with NextSeq platform, 7,000 target microsatellite loci were examined and compared to the reference genome hg19 from the University of California). The three platforms generated highly concordant results as previously reported (2) and in the rare cases of discordant results, the MSI or MMR status of the tumor was determined in the order of FA, IHC and NGS.

### **Assessment of the tumor mutational burden (TMB) in the Caris dataset.**

TMB was measured by counting all nonsynonymous missense, nonsense, in-frame insertion/deletion and frameshift mutations found per tumor that had not been previously described as germline alterations in dbSNP151, Genome Aggregation Database (gnomAD) databases or benign variants identified by Caris

geneticists. A cutoff point of  $\geq 10$  mutations per MB was used based on the KEYNOTE-158 trial (3). Caris Life Sciences is a participant in the Friends of Cancer Research TMB Harmonization Project (4).

### **Gene Set Enrichment Analysis (GSEA), Ingenuity Pathway Analysis (IPA) and signature scores in the Caris dataset.**

WTS data was used as input for pathway gene enrichment analyses using GSEA (5) and significantly enriched results were reported as having a  $P < 0.05$  and FDR ( $q$ ) of  $< 0.25$ .

Gene expression pathways were analyzed using Differential Gene Expression analysis (limma) and QIAGEN IPA (QIAGEN Inc., <https://digitalinsights.qiagen.com/IPA>) (6).

WTS data was used to analyze both Interferon gamma signature (7) and T cell inflamed score (8).

### **RNA Sequencing in the CALGB/SWOG 80405 dataset.**

In the CALGB/SWOG 80405, RNA-seq (Illumina HiSeq 2500) was performed using RNA isolated from FFPE samples. RNA was extracted using the High Pure FFPE RNA Isolation Kit (Roche). RNA libraries were prepared for sequencing with 250ng of input RNA using the Illumina TruSeq RNA Access target enrichment and library preparation protocol. Paired-end RNA-Seq was performed targeting 50 M reads with a read length of 2x100 bp per sample on the Illumina HiSeq 2500 instrument. RNA-seq data quality control and normalization were performed using MAPRSEQ 3.1 and Conditional Quantile Normalization (CQN) as previously published (9, 10).

## References

1. Patro R, Duggal G, Love MI, Irizarry RA, Kingsford C. Salmon provides fast and bias-aware quantification of transcript expression. *Nature methods*. 2017;14(4):417-9.
2. Vanderwalde A, Spetzler D, Xiao N, Gatalica Z, Marshall J. Microsatellite instability status determined by next-generation sequencing and compared with PD-L1 and tumor mutational burden in 11,348 patients. *Cancer Med*. 2018;7(3):746-56.
3. Marabelle A, Fakih M, Lopez J, Shah M, Shapira-Frommer R, Nakagawa K, et al. Association of tumour mutational burden with outcomes in patients with advanced solid tumours treated with pembrolizumab: prospective biomarker analysis of the multicohort, open-label, phase 2 KEYNOTE-158 study. *The Lancet Oncology*. 2020;21(10):1353-65.
4. Merino DM, McShane LM, Fabrizio D, Funari V, Chen SJ, White JR, et al. Establishing guidelines to harmonize tumor mutational burden (TMB): in silico assessment of variation in TMB quantification across diagnostic platforms: phase I of the Friends of Cancer Research TMB Harmonization Project. *J Immunother Cancer*. 2020;8(1).
5. Subramanian A, Tamayo P, Mootha VK, Mukherjee S, Ebert BL, Gillette MA, et al. Gene set enrichment analysis: a knowledge-based approach for interpreting genome-wide expression profiles. *Proc Natl Acad Sci U S A*. 2005;102(43):15545-50.
6. Krämer A, Green J, Pollard J, Jr., Tugendreich S. Causal analysis approaches in Ingenuity Pathway Analysis. *Bioinformatics*. 2014;30(4):523-30.
7. Ayers M, Lunceford J, Nebozhyn M, Murphy E, Loboda A, Kaufman DR, et al. IFN- $\gamma$ -related mRNA profile predicts clinical response to PD-1 blockade. *J Clin Invest*. 2017;127(8):2930-40.
8. Bao R, Stapor D, Luke JJ. Molecular correlates and therapeutic targets in T cell-inflamed versus non-T cell-inflamed tumors across cancer types. *Genome Med*. 2020;12(1):90.
9. Kalari KR, Nair AA, Bhavsar JD, O'Brien DR, Davila JI, Bockol MA, et al. MAP-RSeq: Mayo Analysis Pipeline for RNA sequencing. *BMC Bioinformatics*. 2014;15(1):224.
10. Hansen KD, Irizarry RA, Wu Z. Removing technical variability in RNA-seq data using conditional quantile normalization. *Biostatistics*. 2012;13(2):204-16.

## SUPPLEMENTARY TABLES

**Table S1. Demographics and Clinical Characteristics of the Caris Cohort According to: (a). *CCR5* expression groups, (b). *CCL5* expression groups.**

**a.**

|                                   | Total      | <i>CCR5 Q1</i> | <i>CCR5 Q2</i> | <i>CCR5 Q3</i> | <i>CCR5 Q4</i> | P-value  |
|-----------------------------------|------------|----------------|----------------|----------------|----------------|----------|
| <b>Patient number</b>             | 7604       | 1901           | 1901           | 1901           | 1901           |          |
| <b>Median age (years)</b>         | 62         | 61             | 62             | 63             | 63             | < 0.0001 |
| <b>Sex</b>                        |            |                |                |                |                |          |
| <b>Male</b>                       | 4224 (56%) | 1045 (55%)     | 1102 (58%)     | 1063 (56%)     | 1014 (53%)     | NS       |
| <b>Female</b>                     | 3380 (44%) | 856 (45%)      | 799 (42%)      | 838 (44%)      | 887 (47%)      |          |
| <b>Location of tumor sampling</b> | 4134 (54%) | 1070 (56%)     | 1112 (58%)     | 1075 (57%)     | 877 (46%)      | < 0.0001 |
| <b>Primary</b>                    | 3458 (45%) | 827 (44%)      | 787 (41%)      | 823 (43%)      | 1021 (54%)     |          |
| <b>Metastatic</b>                 | 12 (0.2%)  | 4 (0.2%)       | 2 (0.1%)       | 3 (0.2%)       | 3 (0.2%)       |          |
| <b>Unclear</b>                    |            |                |                |                |                |          |
| <b>Primary tumor location</b>     | 4160 (55%) | 1067 (56%)     | 1108 (58%)     | 1033 (54%)     | 952 (50%)      | < 0.001  |
| <b>Left</b>                       | 2310 (30%) | 550 (29%)      | 535 (28%)      | 593 (31%)      | 632 (33%)      |          |
| <b>Right</b>                      | 1134 (15%) | 284 (15%)      | 258 (14%)      | 275 (14%)      | 317 (17%)      |          |
| <b>Unclear</b>                    |            |                |                |                |                |          |

**b.**

|                                   | Total      | <i>CCL5 Q1</i> | <i>CCL5 Q2</i> | <i>CCL5 Q3</i> | <i>CCL5 Q4</i> | P-value  |
|-----------------------------------|------------|----------------|----------------|----------------|----------------|----------|
| <b>Patient number</b>             | 7604       | 1901           | 1901           | 1901           | 1901           |          |
| <b>Median age (years)</b>         | 62         | 60             | 62             | 62             | 63             | < 0.01   |
| <b>Sex</b>                        |            |                |                |                |                |          |
| <b>Male</b>                       | 4224 (56%) | 1045 (55%)     | 1117 (59%)     | 1056 (56%)     | 1006 (53%)     | NS       |
| <b>Female</b>                     | 3380 (44%) | 856 (45%)      | 784 (41%)      | 845 (44%)      | 895 (47%)      |          |
| <b>Location of tumor sampling</b> | 4134 (54%) | 1008 (53%)     | 1081 (57%)     | 1071 (56%)     | 974 (51%)      | NS       |
| <b>Primary</b>                    | 3458 (45%) | 890 (47%)      | 819 (43%)      | 826 (43%)      | 923 (49%)      |          |
| <b>Metastatic</b>                 | 12 (0.2%)  | 3 (0.2%)       | 1 (0.1%)       | 4 (0.2%)       | 4 (0.2%)       |          |
| <b>Unclear</b>                    |            |                |                |                |                |          |
| <b>Primary tumor location</b>     | 4160 (55%) | 1106 (58%)     | 1112 (58%)     | 1042 (55%)     | 900 (47%)      | < 0.0001 |
| <b>Left</b>                       | 2310 (30%) | 509 (27%)      | 521 (27%)      | 586 (31%)      | 694 (37%)      |          |
| <b>Right</b>                      | 1134 (15%) | 286 (15%)      | 268 (14%)      | 273 (14%)      | 307 (16%)      |          |
| <b>Unclear</b>                    |            |                |                |                |                |          |

Transverse colon tumor location grouped with right and rectal tumors grouped with left.

*P*-values reflect Q1 vs Q4 comparison.

**Table S2. Significant GSEA Results in pMMR/MSS CRC ( $P < 0.05$  and  $q < 0.25$ ).**

| CCL5 Q1 vs Q4                      | size | es    | nes   | p.values | q.values |
|------------------------------------|------|-------|-------|----------|----------|
| HALLMARK_ADIPOGENESIS              | 191  | -0.74 | -1.30 | 0.03     | 0.15     |
| HALLMARK_ALLOGRAFT_REJECTION       | 194  | -0.77 | -1.30 | 0.02     | 0.16     |
| HALLMARK_APOPTOSIS                 | 159  | -0.75 | -1.30 | 0.03     | 0.21     |
| HALLMARK_INTERFERON_GAMMA_RESPONSE | 198  | -0.79 | -1.30 | 0.01     | 0.15     |
| HALLMARK_KRAS_SIGNALING_DN         | 193  | -0.63 | -1.30 | 0.03     | 0.15     |
| HALLMARK_PI3K_AKT_MTOR_SIGNALING   | 104  | -0.78 | -1.28 | 0.045    | 0.17     |

Negative enrichment score indicates that these pathways were enriched in Q4 (*CCL5* high expressed tumors).

No pathways in GSEA met statistical significance for *CCR5*.

**Table S3. Demographics and Clinical Characteristics of CALGB/SWOG 80405 Patients According to *CCR5* and *CCL5* Expression (by tertile).**

|                                   | Overall<br>(N=429) | <i>CCR5</i>       |                   |                   |                  | <i>CCL5</i>       |                   |                   |                  |
|-----------------------------------|--------------------|-------------------|-------------------|-------------------|------------------|-------------------|-------------------|-------------------|------------------|
|                                   |                    | T1<br>(N=144)     | T2<br>(N=143)     | T3<br>(N=142)     | <i>P</i> -value* | T1<br>(N=146)     | T2<br>(N=144)     | T3<br>(N=139)     | <i>P</i> -value* |
| <b>Age</b>                        |                    |                   |                   |                   |                  |                   |                   |                   |                  |
| Median (Min, Max)                 | 60.1 (24.0, 83.4)  | 59.3 (24.0, 78.8) | 58.9 (26.0, 83.1) | 63.2 (30.6, 83.4) | <b>0.044</b>     | 60.2 (34.4, 78.8) | 58.5 (24.0, 80.2) | 62.8 (26.0, 83.4) | 0.16             |
| <b>Sex</b>                        |                    |                   |                   |                   |                  |                   |                   |                   |                  |
| Male                              | 269 (63 %)         | 91 (63 %)         | 93 (65 %)         | 85 (60 %)         | 0.66             | 99 (68 %)         | 84 (58 %)         | 86 (62 %)         | 0.24             |
| Female                            | 160 (37 %)         | 53 (37 %)         | 50 (35 %)         | 57 (40 %)         |                  | 47 (32 %)         | 60 (42 %)         | 53 (38 %)         |                  |
| <b>ECOG performance status</b>    |                    |                   |                   |                   |                  |                   |                   |                   |                  |
| 0                                 | 251 (59 %)         | 90 (62 %)         | 78 (55 %)         | 83 (58 %)         | 0.4              | 94 (64 %)         | 86 (60 %)         | 71 (51 %)         | 0.07             |
| 1                                 | 178 (41 %)         | 54 (38 %)         | 65 (45 %)         | 59 (42 %)         |                  | 52 (36 %)         | 58 (40 %)         | 68 (49 %)         |                  |
| <b>Primary tumor sidedness</b>    |                    |                   |                   |                   |                  |                   |                   |                   |                  |
| Left                              | 256 (60 %)         | 87 (60 %)         | 91 (64 %)         | 78 (55 %)         | 0.32             | 95 (65 %)         | 94 (65 %)         | 67 (48 %)         | <b>0.004</b>     |
| Right or transverse               | 173 (40 %)         | 57 (40 %)         | 52 (36 %)         | 64 (45 %)         |                  | 51 (35 %)         | 50 (35 %)         | 72 (52 %)         |                  |
| <b>Number of metastatic sites</b> |                    |                   |                   |                   |                  |                   |                   |                   |                  |
| 1                                 | 221 (52 %)         | 78 (54 %)         | 74 (52 %)         | 69 (49 %)         | 0.46             | 81 (55 %)         | 73 (51 %)         | 67 (48 %)         | <b>0.031</b>     |
| 2                                 | 147 (34 %)         | 51 (35 %)         | 49 (34 %)         | 47 (33 %)         |                  | 53 (36 %)         | 52 (36 %)         | 42 (30 %)         |                  |
| 3+                                | 61 (14 %)          | 15 (10 %)         | 20 (14 %)         | 26 (18 %)         |                  | 12 (8 %)          | 19 (13 %)         | 30 (22 %)         |                  |
| <b>Treatment arm</b>              |                    |                   |                   |                   |                  |                   |                   |                   |                  |
| Bevacizumab                       | 223 (52 %)         | 77 (53 %)         | 73 (51 %)         | 73 (51 %)         | 0.91             | 78 (53 %)         | 74 (51 %)         | 71 (51 %)         | 0.91             |
| Cetuximab                         | 206 (48 %)         | 67 (47 %)         | 70 (49 %)         | 69 (49 %)         |                  | 68 (47 %)         | 70 (49 %)         | 68 (49 %)         |                  |
| <b>Backbone chemotherapy</b>      |                    |                   |                   |                   |                  |                   |                   |                   |                  |
| FOLFIRI                           | 109 (25 %)         | 43 (30 %)         | 32 (22 %)         | 34 (24 %)         | 0.32             | 40 (27 %)         | 32 (22 %)         | 37 (27 %)         | 0.55             |



|                            | Overall<br>(N=429) | CCR5          |               |               |          | CCL5          |               |               |                |
|----------------------------|--------------------|---------------|---------------|---------------|----------|---------------|---------------|---------------|----------------|
|                            |                    | T1<br>(N=144) | T2<br>(N=143) | T3<br>(N=142) | P-value* | T1<br>(N=146) | T2<br>(N=144) | T3<br>(N=139) | P-value*       |
| FOLFOX                     | 320 (75 %)         | 101 (70 %)    | 111 (78 %)    | 108 (76 %)    |          | 106 (73 %)    | 112 (78 %)    | 102 (73 %)    |                |
| <b>RAS status</b>          |                    |               |               |               |          |               |               |               |                |
| Wildtype                   | 318 (74%)          | 98 (68 %)     | 111 (78 %)    | 109 (77 %)    | 0.39     | 104 (71 %)    | 103 (72 %)    | 111 (80 %)    | 0.31           |
| Mutant                     | 80 (19%)           | 33 (23 %)     | 23 (16 %)     | 24 (17 %)     |          | 29 (20 %)     | 32 (22 %)     | 19 (14 %)     |                |
| Unknown                    | 31 (7%)            | 13 (9 %)      | 9 (6 %)       | 9 (6 %)       |          | 13 (9 %)      | 9 (6 %)       | 9 (6 %)       |                |
| <b>KRAS status</b>         |                    |               |               |               |          |               |               |               |                |
| Wildtype                   | 362 (84 %)         | 116 (81 %)    | 123 (86 %)    | 123 (87 %)    | 0.32     | 121 (83 %)    | 121 (84 %)    | 120 (86 %)    | 0.72           |
| Mutant                     | 67 (16 %)          | 28 (19 %)     | 20 (14 %)     | 19 (13 %)     |          | 25 (17 %)     | 23 (16 %)     | 19 (14 %)     |                |
| <b>NRAS status</b>         |                    |               |               |               |          |               |               |               |                |
| Wildtype                   | 376 (88%)          | 120 (83 %)    | 131 (92 %)    | 125 (88 %)    | 0.24     | 124 (85 %)    | 124 (86 %)    | 128 (92 %)    | <b>0.049</b>   |
| Mutant                     | 14 (3%)            | 5 (3 %)       | 3 (2 %)       | 6 (4 %)       |          | 4 (3 %)       | 9 (6 %)       | 1 (1 %)       |                |
| Unknown                    | 39 (9%)            | 19 (13 %)     | 9 (6 %)       | 11 (8 %)      |          | 18 (12 %)     | 11 (8 %)      | 10 (7 %)      |                |
| <b>BRAF status</b>         |                    |               |               |               |          |               |               |               |                |
| Wildtype                   | 330 (77 %)         | 108 (75%)     | 118 (83 %)    | 104 (73 %)    | 0.075    | 112 (77 %)    | 121 (84 %)    | 97 (70 %)     | <b>0.0032</b>  |
| Mutant                     | 60 (14 %)          | 17 (12 %)     | 16 (11 %)     | 27 (19 %)     |          | 16 (11 %)     | 12 (8 %)      | 32 (23 %)     |                |
| Missing                    | 39 (9%)            | 19 (13%)      | 9 (6%)        | 11 (8%)       |          | 18 (12 %)     | 11 (8 %)      | 10 (7 %)      |                |
| <b>MSI status from PCR</b> |                    |               |               |               |          |               |               |               |                |
| MSI-H                      | 29 (7 %)           | 4 (3 %)       | 11 (8 %)      | 14 (10 %)     | 0.11     | 2 (1 %)       | 6 (4 %)       | 21 (15 %)     | <b>8.2e-05</b> |
| MSI-L                      | 19 (4 %)           | 7 (5 %)       | 8 (6 %)       | 4 (3 %)       |          | 10 (7 %)      | 5 (3 %)       | 4 (3 %)       |                |
| MSS                        | 328 (76 %)         | 110 (76%)     | 111 (78 %)    | 107 (75 %)    |          | 111 (76 %)    | 120 (83 %)    | 97 (70 %)     |                |
| Missing                    | 53 (13%)           | 23 (16%)      | 13 (9%)       | 17 (12%)      |          | 23 (16 %)     | 13 (9 %)      | 17 (12 %)     |                |

\*P-values were generated with Kruskal–Wallis tests and Fisher’s exact tests for continuous variables and categorical variables, respectively.

**Table S4. Demographics and Clinical Characteristics of CALGB/SWOG 80405 Patients According to CCR/L5 Composite Biomarker Expression (by tertile).**

|                                   | <b>T1<br/>(N=143)</b> | <b>T2<br/>(N=144)</b> | <b>T3<br/>(N=142)</b> | <b>P-value*</b> |
|-----------------------------------|-----------------------|-----------------------|-----------------------|-----------------|
| <b>Age</b>                        |                       |                       |                       |                 |
| Median (Min, Max)                 | 59.4 (31.5, 78.8)     | 59.0 (24.0, 81.7)     | 63.2 (26.0, 83.4)     | 0.13            |
| <b>Sex</b>                        |                       |                       |                       |                 |
| Male                              | 92 (64 %)             | 90 (62 %)             | 87 (61 %)             | 0.87            |
| Female                            | 51 (36 %)             | 54 (38 %)             | 55 (39 %)             |                 |
| <b>ECOG performance status</b>    |                       |                       |                       |                 |
| 0                                 | 91 (64 %)             | 82 (57 %)             | 78 (55 %)             | 0.29            |
| 1                                 | 52 (36 %)             | 62 (43 %)             | 64 (45 %)             |                 |
| <b>Primary tumor sidedness</b>    |                       |                       |                       |                 |
| Left                              | 93 (65 %)             | 92 (64 %)             | 71 (50 %)             | <b>0.017</b>    |
| Right or transverse               | 50 (35 %)             | 52 (36 %)             | 71 (50 %)             |                 |
| <b>Number of metastatic sites</b> |                       |                       |                       |                 |
| 1                                 | 75 (52 %)             | 78 (54 %)             | 68 (48 %)             | 0.13            |
| 2                                 | 54 (38 %)             | 48 (33 %)             | 45 (32 %)             |                 |
| 3+                                | 14 (10 %)             | 18 (12 %)             | 29 (20 %)             |                 |
| <b>Treatment arm</b>              |                       |                       |                       |                 |
| Bevacizumab                       | 78 (55 %)             | 71 (49 %)             | 74 (52 %)             | 0.67            |
| Cetuximab                         | 65 (45 %)             | 73 (51 %)             | 68 (48 %)             |                 |
| <b>Backbone chemotherapy</b>      |                       |                       |                       |                 |
| FOLFIRI                           | 40 (28 %)             | 33 (23 %)             | 36 (25 %)             | 0.62            |
| FOLFOX                            | 103 (72 %)            | 111 (77 %)            | 106 (75 %)            |                 |
| <b>RAS status</b>                 |                       |                       |                       |                 |
| Wildtype                          | 100 (70 %)            | 109 (76 %)            | 109 (77 %)            | 0.74            |
| Mutant                            | 31 (22 %)             | 25 (17 %)             | 24 (17 %)             |                 |
| Unknown                           | 12 (8 %)              | 10 (7 %)              | 9 (6 %)               |                 |
| <b>KRAS status</b>                |                       |                       |                       |                 |
| Wildtype                          | 116 (81 %)            | 123 (85 %)            | 123 (87 %)            | 0.41            |
| Mutant                            | 27 (19 %)             | 21 (15 %)             | 19 (13 %)             |                 |
| <b>NRAS status</b>                |                       |                       |                       |                 |
| Wildtype                          | 121 (85 %)            | 130 (90 %)            | 125 (88 %)            | 0.46            |
| Mutant                            | 4 (3 %)               | 4 (3 %)               | 6 (4 %)               |                 |
| Unknown                           | 18 (13 %)             | 10 (7 %)              | 11 (8 %)              |                 |
| <b>BRAF status</b>                |                       |                       |                       |                 |
| Wildtype                          | 111 (78 %)            | 118 (82 %)            | 101 (71 %)            | <b>0.024</b>    |
| Mutant                            | 14 (10 %)             | 16 (11 %)             | 30 (21 %)             |                 |
| Unknown                           | 18 (13 %)             | 10 (7 %)              | 11 (8 %)              |                 |
| <b>MSI status from PCR</b>        |                       |                       |                       |                 |

|         | <b>T1<br/>(N=143)</b> | <b>T2<br/>(N=144)</b> | <b>T3<br/>(N=142)</b> | <b>P-value*</b> |
|---------|-----------------------|-----------------------|-----------------------|-----------------|
| MSI-H   | 1 (1 %)               | 9 (6 %)               | 19 (13 %)             | <b>0.001</b>    |
| MSI-L   | 9 (6 %)               | 5 (3 %)               | 5 (4 %)               |                 |
| MSS     | 113 (79 %)            | 115 (80 %)            | 100 (70 %)            |                 |
| Unknown | 20 (14 %)             | 15 (10 %)             | 18 (13 %)             |                 |

\*P-values were generated with Kruskal–Wallis tests and Fisher’s exact tests for continuous variables and categorical variables, respectively.

**Table S5. Patient Outcome According to Tumor Sidedness in the pMMR/MSS Caris CODEai Cohort.**

|                                  | LEFT                  |                       | RIGHT                 |                       |
|----------------------------------|-----------------------|-----------------------|-----------------------|-----------------------|
| HAZARD RATIO ( <i>P</i> -values) | CCL5 HIGH vs. LOW MSS | CCR5 HIGH vs. LOW MSS | CCL5 HIGH vs. LOW MSS | CCR5 HIGH vs. LOW MSS |
| <b>REGARDLESS OF TREATMENT</b>   | 1.015 (0.844)         | 0.96 (0.589)          | 1.101 (0.188)         | 0.983 (0.812)         |
| <b>OXALIPLATIN</b>               | 1.057 (0.531)         | 0.896 (0.212)         | 0.911 (0.343)         | <b>0.789 (0.016)</b>  |
| <b>IRINOTECAN</b>                | 1.055 (0.631)         | 0.93 (0.497)          | 0.988 (0.929)         | 0.799 (0.079)         |
| <b>CETUXIMAB</b>                 | 0.946 (0.824)         | 0.74 (0.226)          | 0.667 (0.229)         | 0.691 (0.283)         |
| <b>BEVACIZUMAB</b>               | 0.96 (0.666)          | <b>0.818 (0.042)</b>  | 0.924 (0.461)         | <b>0.806 (0.044)</b>  |

HR provided for Q4 vs Q1.

## SUPPLEMENTARY FIGURES

Figure S1. Patient Cohorts Flow Diagrams.

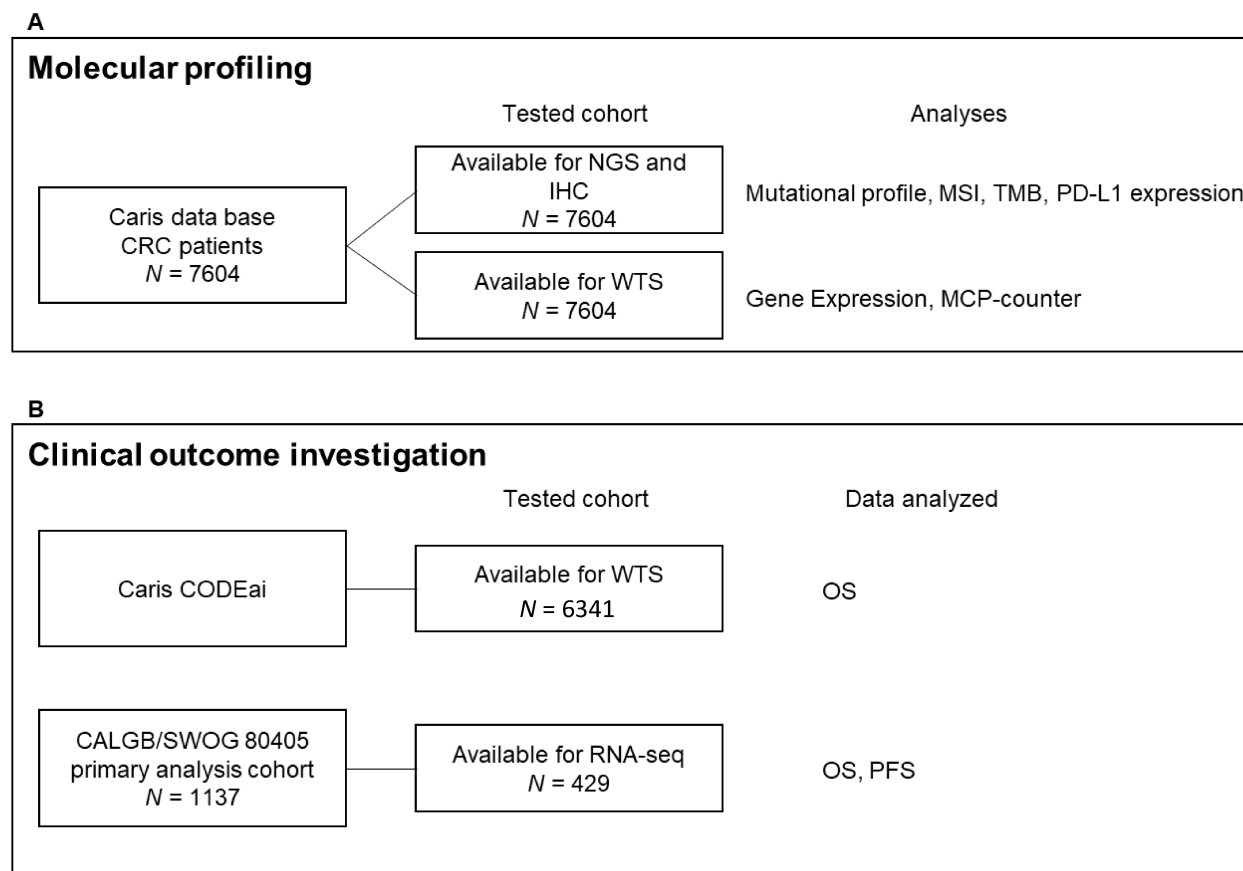

The flow diagrams show which patient cohort was tested for each analysis in this study for molecular profiling (A) and clinical outcome investigation (B).

*Abbreviations:* CRC, colorectal cancer; IHC, immunohistochemistry; MSI, microsatellite instability; NGS, next-generation sequencing; OS, overall survival; PFS, progression-free survival; RNA-seq, RNA-sequencing; TMB, tumor mutational burden; WTS, whole transcriptome sequencing.

**Figure S2. Correlation between CCR5 and CCL5 Expression in CRC and Expression Levels in Primary Tumors vs Metastatic Sites.**

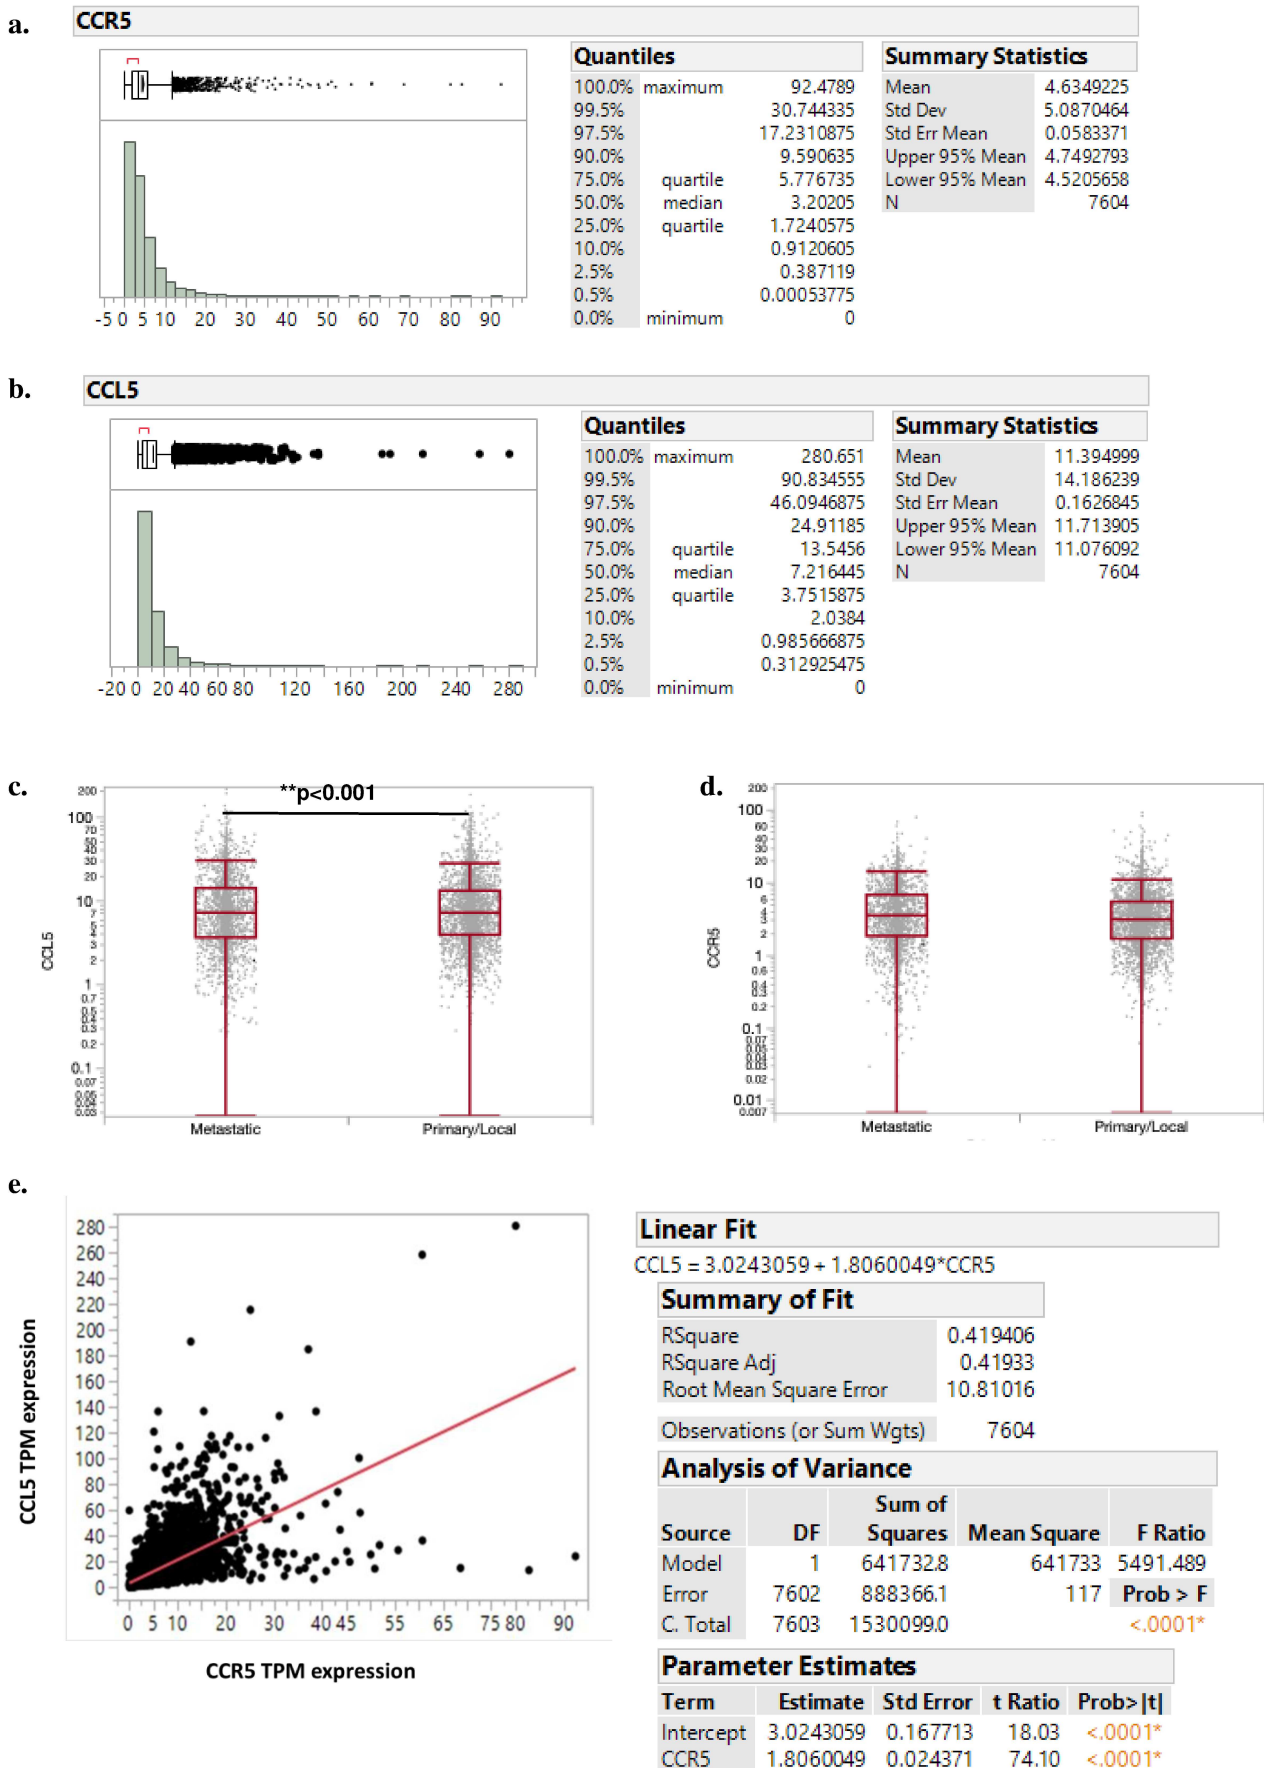

Figure S3. Association between *CCR5* and *CCL5* Expression and Tumor Molecular Characteristics in pMMR/MSS CRC.

a.

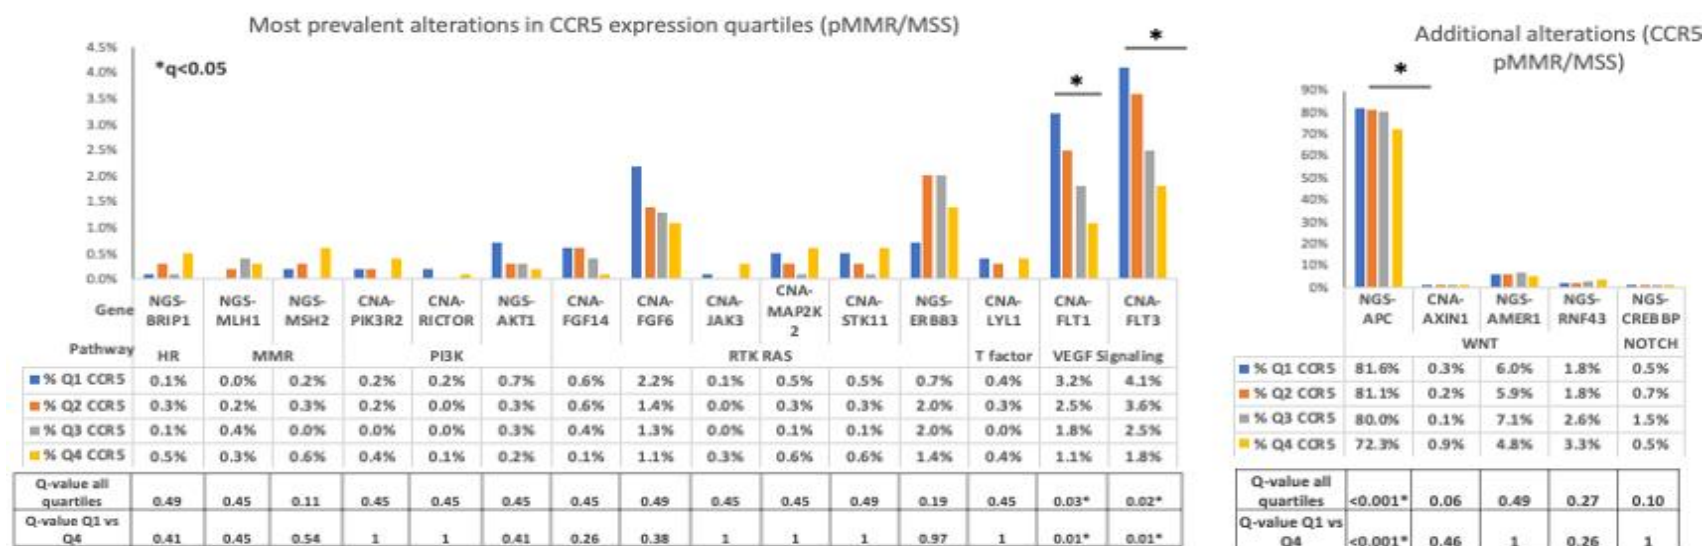

b.

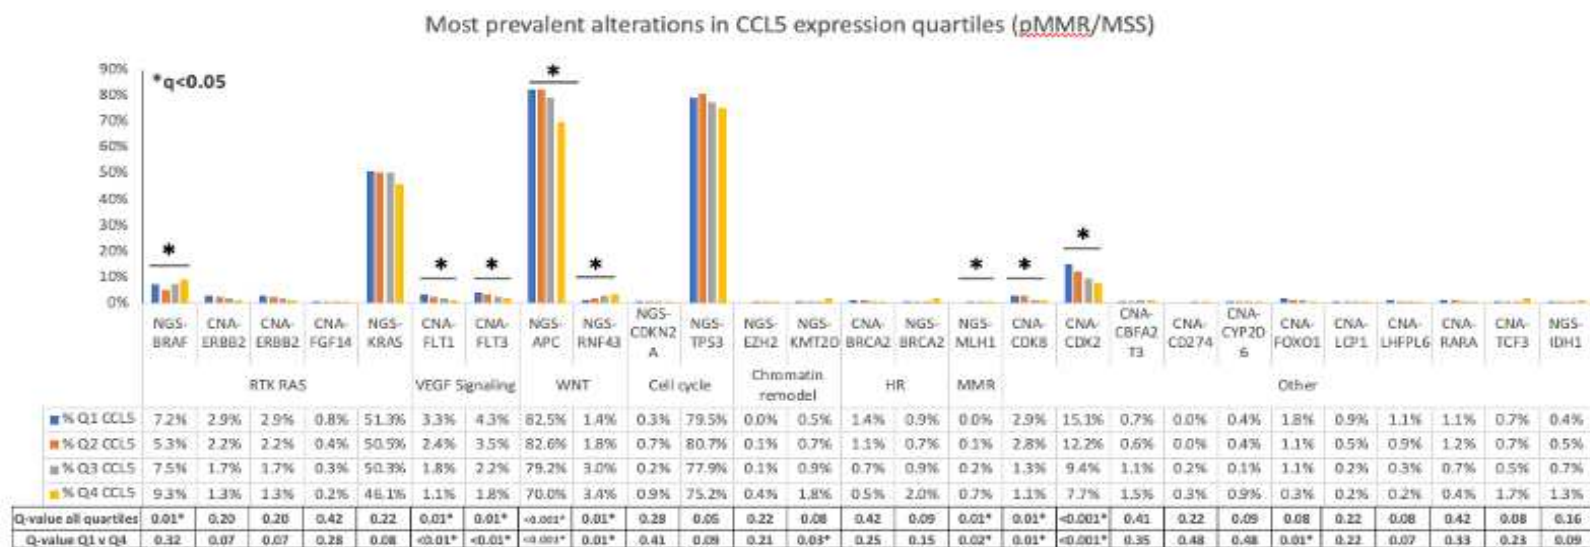

**Figure S4. Ingenuity Pathway Analysis Results for *CCR5* and *CCL5* Q1 vs Q4 in pMMR/MSS CRC.****a.**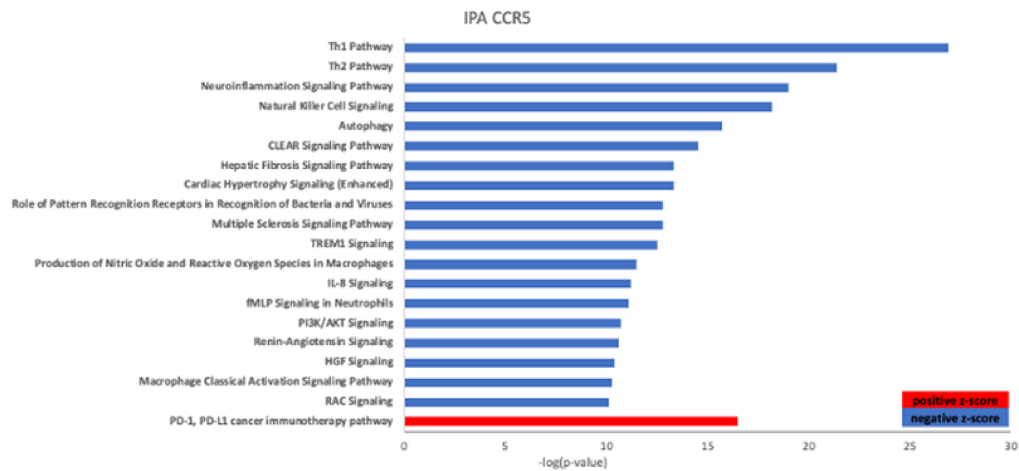**b.**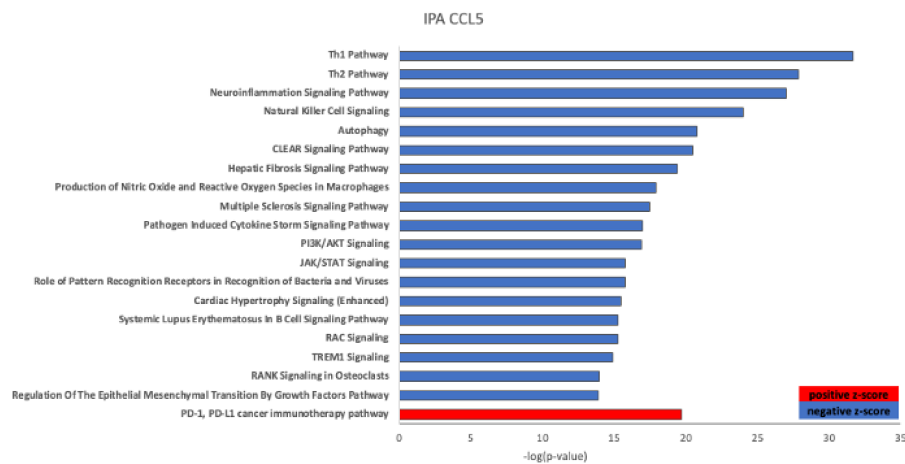**c.**

**Pathways Upregulated in CCR5 Q4 (Z score >=2)**

| Ingenuity Canonical Pathways                  | -log(p-value) | Ratio | z-score |
|-----------------------------------------------|---------------|-------|---------|
| PD-1, PD-L1 cancer immunotherapy pathway      | 16.5          | 0.566 | 3.983   |
| PTEN Signaling                                | 6.92          | 0.38  | 3.92    |
| PPARα/RXRα Activation                         | 4.79          | 0.323 | 3.781   |
| PPAR Signaling                                | 3.73          | 0.346 | 4.459   |
| RHOGDI Signaling                              | 3.37          | 0.291 | 5.032   |
| Antioxidant Action of Vitamin C               | 2.11          | 0.295 | 5.196   |
| Role of p14/p19ARF in Tumor Suppression       | 2.1           | 0.4   | 2.887   |
| CDX Gastrointestinal Cancer Signaling Pathway | 1.91          | 0.262 | 2.828   |
| CTLA4 Signaling in Cytotoxic T Lymphocytes    | 1.09          | 0.219 | 5.964   |
| Cyclins and Cell Cycle Regulation             | 0.839         | 0.247 | 2.496   |
| LXR/RXR Activation                            | 0.668         | 0.228 | 2.449   |
| SPINK1 Pancreatic Cancer Pathway              | 0             | 0.15  | 3       |

**d.**

**Pathways Upregulated in CCL5 Q4 (Z score >=2)**

| Ingenuity Canonical Pathways                  | -log(p-value) | Ratio | z-score |
|-----------------------------------------------|---------------|-------|---------|
| PD-1, PD-L1 cancer immunotherapy pathway      | 19.7          | 0.604 | 4.276   |
| PTEN Signaling                                | 10.7          | 0.433 | 4.621   |
| PPAR Signaling                                | 9.81          | 0.467 | 4.619   |
| PPARα/RXRα Activation                         | 7.26          | 0.359 | 4.371   |
| Antioxidant Action of Vitamin C               | 5.17          | 0.375 | 5.657   |
| RHOGDI Signaling                              | 5.07          | 0.318 | 5.374   |
| Endocannabinoid Cancer Inhibition Pathway     | 4.31          | 0.333 | 2.654   |
| CTLA4 Signaling in Cytotoxic T Lymphocytes    | 3.69          | 0.253 | 6.917   |
| CDX Gastrointestinal Cancer Signaling Pathway | 3.52          | 0.297 | 2.782   |
| Role of p14/p19ARF in Tumor Suppression       | 3.17          | 0.467 | 3.742   |
| SPINK1 Pancreatic Cancer Pathway              | 0             | 0.15  | 3       |

Figure S4 (a) and (b) show top 20 significant results of IPA for *CCR5* and *CCL5*, respectively; (c) and (d) show upregulated pathways with Z score  $\geq 2$  for *CCR5* and *CCL5* Q4, respectively.



**Figure S5. Comparison of Immune Cell Ratio in the TME According to CCR5 and CCL5 Expression (Q1 vs Q4) in pMMR/MSS CRC.**

| Complete cohort, CCR5   |                     |                 |                 | Complete cohort, CCL5   |                     |                 |                 |
|-------------------------|---------------------|-----------------|-----------------|-------------------------|---------------------|-----------------|-----------------|
| CCR5 TME ratios         | KW p value Q1 vs Q4 | Median ratio Q1 | Median ratio Q4 | CCL5 TME ratios         | KW p value Q1 vs Q4 | Median ratio Q1 | Median ratio Q4 |
| B cell/Lymphocytes      | **p<0.0001          | 0.3833          | 0.3480          | B cell/Lymphocytes      | **p<0.0001          | 0.3885          | 0.3372          |
| M1/M2                   | **p<0.0001          | 1.6890          | 1.3267          | M1/M2                   | 0.4172              | 1.5430          | 1.5055          |
| Neutrophil/Lymphocytes  | **p<0.0001          | 0.7906          | 0.5178          | Neutrophil/Lymphocytes  | **p<0.0001          | 0.796           | 0.4708          |
| NK cell/Lymphocytes     | **p<0.0001          | 0.4083          | 0.2985          | NK cell/Lymphocytes     | **p<0.0001          | 0.416           | 0.2888          |
| CD4+ T cell/Lymphocytes | **p<0.0001          | 0               | 0               | CD4+ T cell/Lymphocytes | **p<0.0001          | 0               | 0               |
| CD8+ T cell/Lymphocytes | **p<0.0001          | 0               | 0.0318          | CD8+ T cell/Lymphocytes | **p<0.0001          | 0               | 0.0484          |
| T reg/Lymphocytes       | **p<0.0001          | 0.1252          | 0.1866          | T reg/Lymphocytes       | **p<0.0001          | 0.1193          | 0.1933          |

  

| MSS cohort, CCR5        |                     |                 |                 | MSS cohort, CCL5        |                     |                 |                 |
|-------------------------|---------------------|-----------------|-----------------|-------------------------|---------------------|-----------------|-----------------|
| CCR5 TME ratios (MSS)   | KW p value Q1 vs Q4 | Median ratio Q1 | Median ratio Q4 | CCL5 TME ratios (MSS)   | KW p value Q1 vs Q4 | Median ratio Q1 | Median ratio Q4 |
| B cell/Lymphocytes      | **p<0.0001          | 0.3864          | 0.3532          | B cell/Lymphocytes      | **p<0.0001          | 0.3894          | 0.3458          |
| M1/M2                   | **p<0.0001          | 1.6469          | 1.2618          | M1/M2                   | 0.0108              | 1.5358          | 1.3756          |
| Neutrophil/Lymphocytes  | **p<0.0001          | 0.8008          | 0.5366          | Neutrophil/Lymphocytes  | **p<0.0001          | 0.8019          | 0.4814          |
| NK cell/Lymphocytes     | **p<0.0001          | 0.4104          | 0.3008          | NK cell/Lymphocytes     | **p<0.0001          | 0.4170          | 0.2891          |
| CD4+ T cell/Lymphocytes | **p<0.0001          | 0               | 0               | CD4+ T cell/Lymphocytes | **p<0.0001          | 0               | 0               |
| CD8+ T cell/Lymphocytes | **p<0.0001          | 0               | 0.0253          | CD8+ T cell/Lymphocytes | **p<0.0001          | 0               | 0.0410          |
| T reg/Lymphocytes       | **p<0.0001          | 0.1206          | 0.1823          | T reg/Lymphocytes       | **p<0.0001          | 0.1164          | 0.1875          |

Lymphocytes: NK, B cells, CD4+ T cells, CD8+ T cells and Treg total count.

**Figure S6. Correlation between *CCR5* and *CCL5* Expression (a) and Association with TMB-H (b) and dMMR/MSI-H (c) in CALGB/SWOG 80405.**

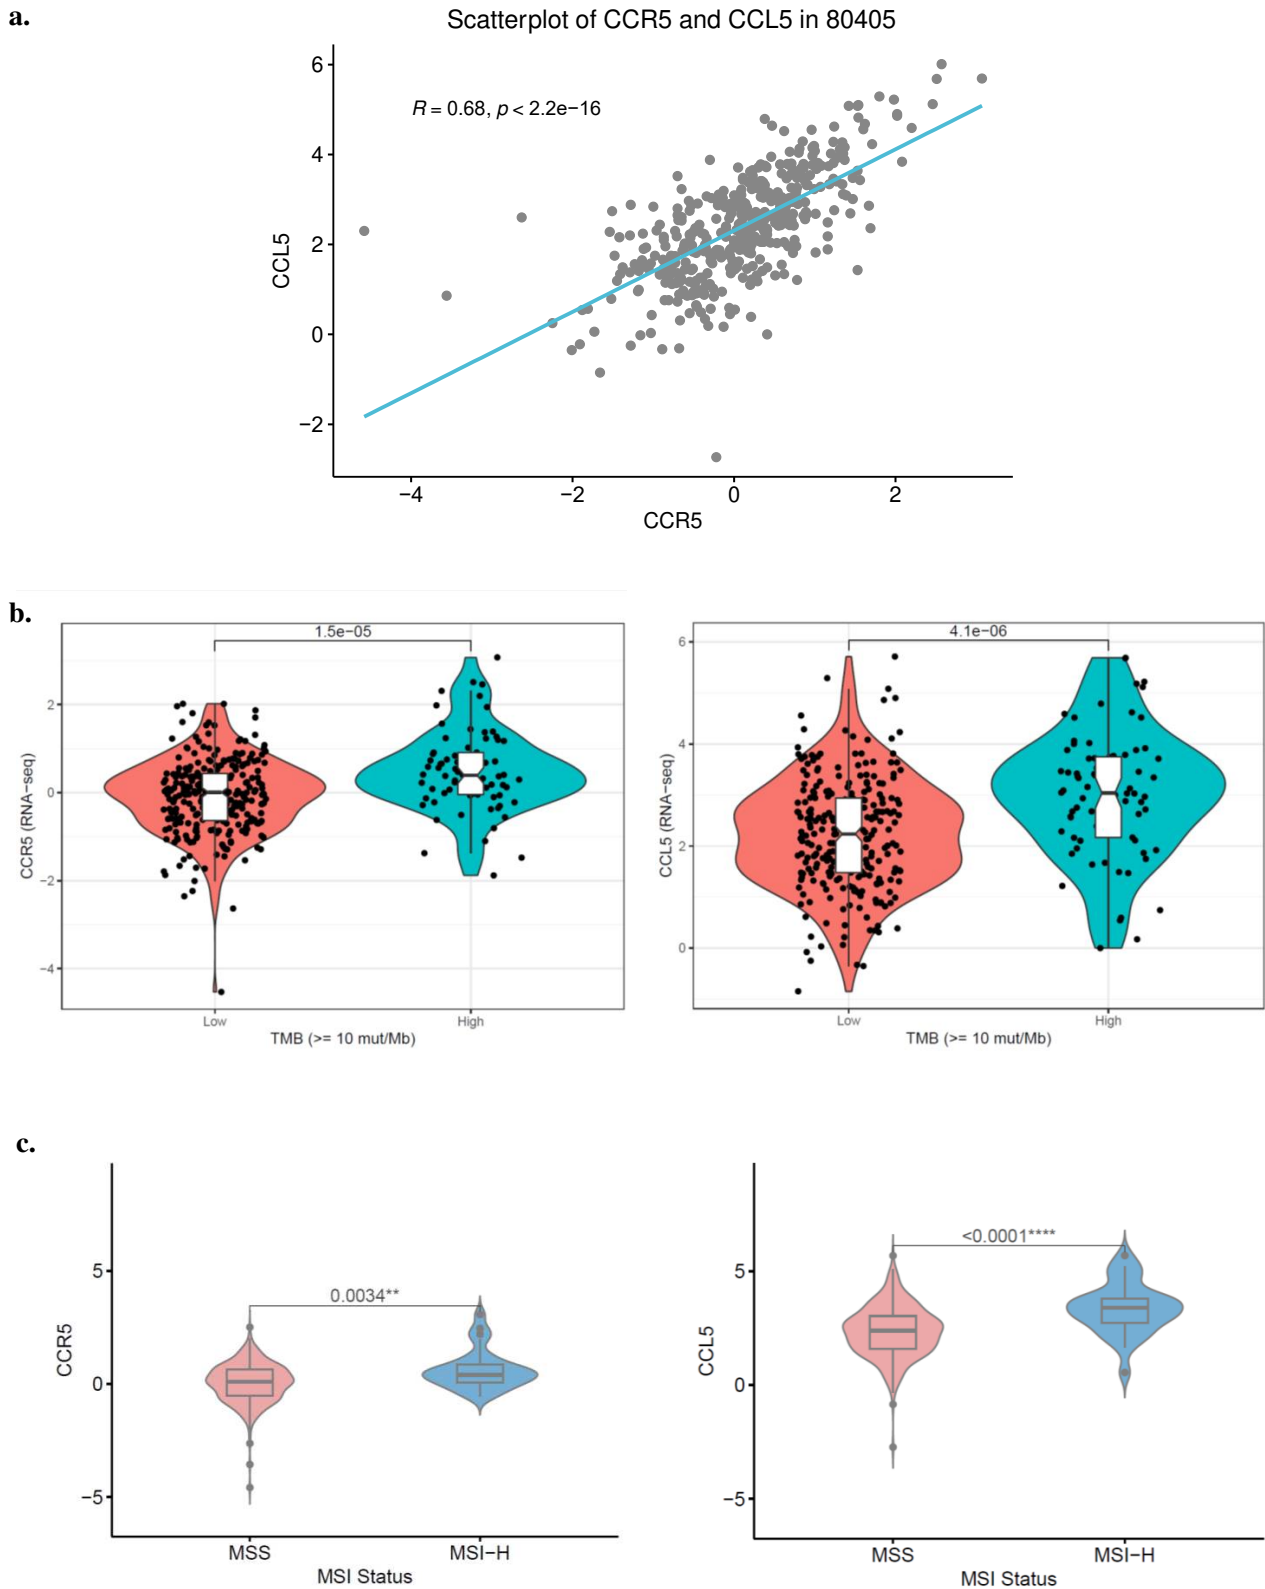

**Figure S7. Association between *CCL5* Expression and Patient Outcomes in the CALGB/SWOG 80405 Trial.**

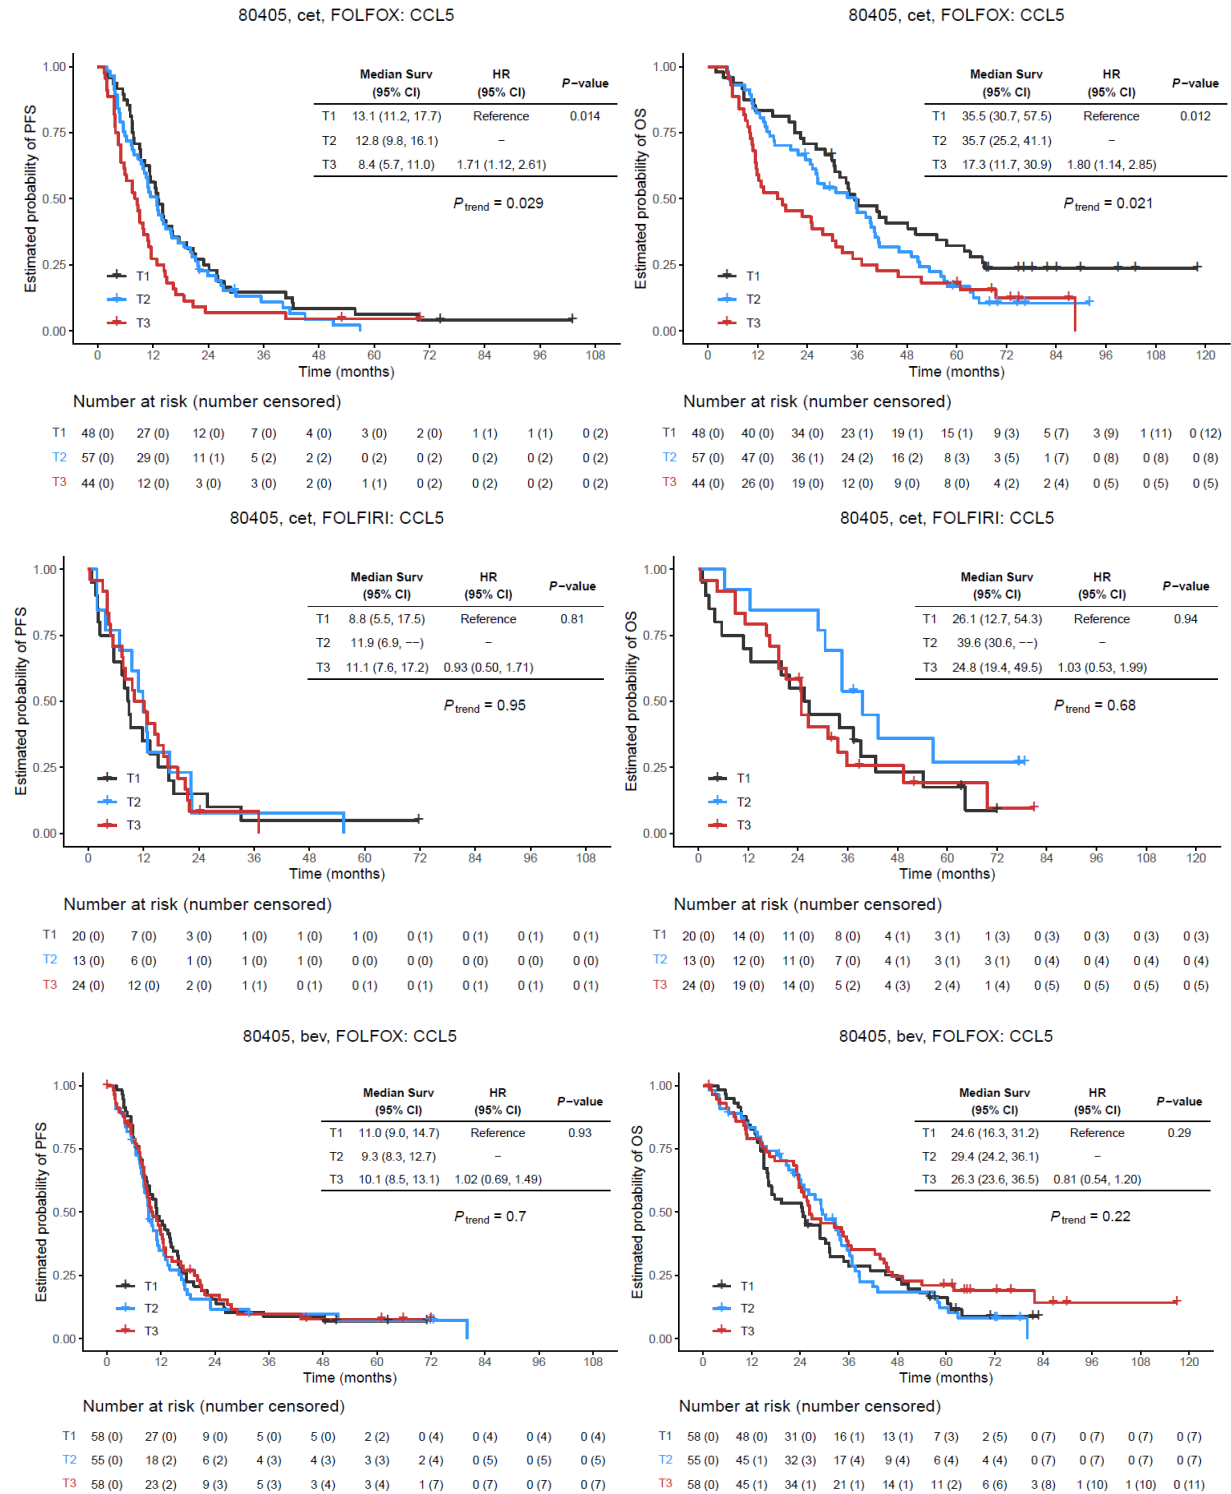

The  $P$ -value corresponds to the statistical comparison for T3 vs T1 within each treatment.

The  $P_{trend}$  corresponds to the statistical test result by evaluating gene expression as a continuous variable.

**Figure S8. Association Between CCR/L5 Combined Expression and Patient Outcomes in the CALGB/SWOG 80405 Trial for RAS/BRAF Wild-type Left-sided Tumors for Bevacizumab-based Treatment and FOLFIRI-based Treatments.**

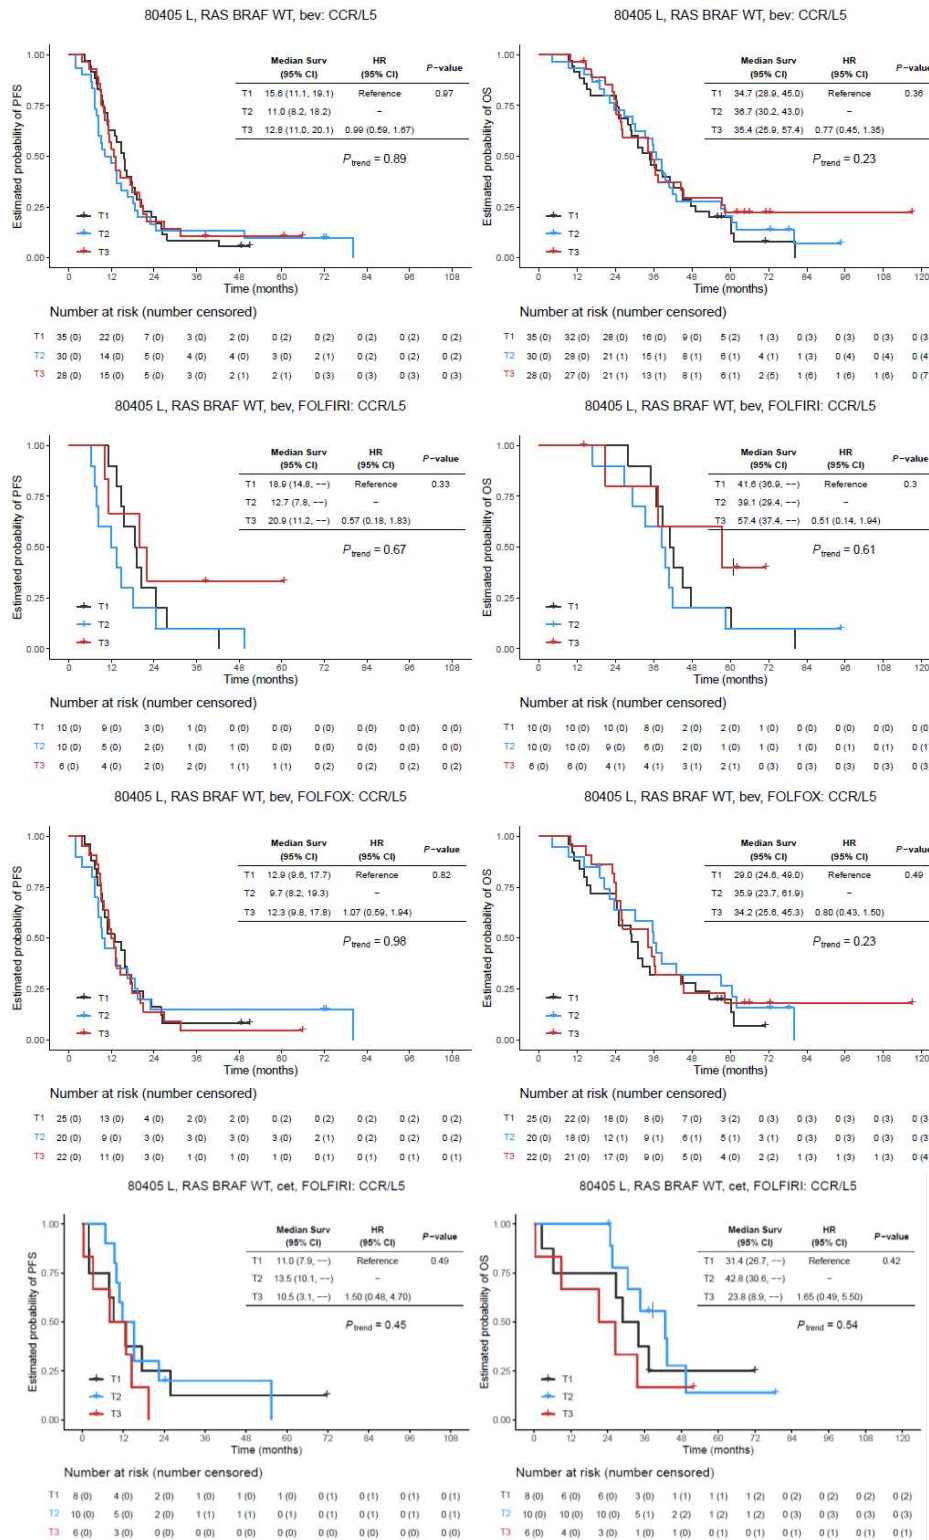

The *P*-value corresponds to the statistical comparison for T3 vs T1 within each treatment.

The *P*<sub>trend</sub> corresponds to the statistical test result by evaluating gene expression as a continuous variable.
